## Metabolic depression in sea urchin barrens associated with food deprivation

NATHAN B. SPINDEL<sup>1, \*</sup>, LYNN C. LEE<sup>2</sup>, AND DANIEL K. OKAMOTO<sup>1</sup>

<sup>1</sup>Florida State University, Department of Biological Science, 319 Stadium Drive, Tallahassee, FL 32306-4295, USA

<sup>2</sup>Gwaii Haanas National Park Reserve, National Marine Conservation Area Reserve, and Haida Heritage Site, 60 Second Beach Road, Skidegate, British Columbia, Canada

\*Corresponding author-: [nspindel@bio.fsu.edu](mailto:nspindel@bio.fsu.edu)

1 *Key words: bioenergetics, metabolism, metabolic scaling, metabolic ecology, food availability,*  
2 *gonad index, sea urchins, barrens.*

3         The proliferation of sea urchins can decimate macroalgal forests in coastal ecosystems,  
4 leading to persistent barren seascapes. While kelp forests are among the most productive  
5 ecosystems on the planet, productivity in these urchin barrens is dramatically reduced (Filbee-  
6 Dexter and Scheibling 2014). Moreover, urchins inhabiting these food-depauperate barrens face  
7 starvation and many survive in these barrens for years or decades. Urchins in barrens can persist  
8 by eating food subsidies from drift algae (Rodríguez 2003, Vanderklift and Wernberg 2008,  
9 Britton-Simmons et al. 2009, Renaud et al. 2015, Quintanilla-Ahumada et al. 2018), pelagic  
10 salps (Duggins 1981), tubeworms (Spindel and Okamoto *personal observation*), as well as  
11 encrusting and filamentous algae, microbial mats, and slow-growing species resistant to  
12 herbivory (Ling and Johnson 2009, Filbee-Dexter and Scheibling 2014, Rasher et al. 2020).  
13 Despite both food from endogenous production and exogenous subsidies, many urchins in  
14 barrens likely experience prolonged food deprivation. This resource limitation may create a  
15 trade-off between reproduction and survival (Stearns 2000); for example, fecundity of purple sea  
16 urchins (*Strongylocentrotus purpuratus*) is 99.9% lower in barrens (Okamoto 2014). Despite  
17 food constraints, red sea urchins (*Mesocentrotus franciscanus*), the dominant urchin species at  
18 our study sites, can live in excess of 100 years (Ebert 2008) and barrens in Haida Gwaii, British  
19 Columbia (BC), Canada, have persisted for at least 143 years (Dawson 1880). While these  
20 phenomena are widespread and well documented, the bioenergetic adaptations that allow urchins  
21 to persist in these food-depauperate barrens remain poorly understood. Here we demonstrate that  
22 *M. franciscanus* in barrens versus kelp forests have substantially lower energy reserves (as

23 measured by gonadal mass) and, importantly, also exhibit dramatic reductions in size-specific  
24 resting metabolic rates (RMR), even after standardizing by metabolically active body mass.

25       Animals often cope with severe food deficiencies by modifying their locomotive activity,  
26 utilizing reversible energy reserves, and/or increasing metabolic efficiency (McCue 2010). For  
27 example, green urchins (*Strongylocentrotus droebachiensis*) may invest energy in active  
28 searching for the potential return of richer pastures (Scheibling et al. 2020), while *M.*  
29 *franciscanus* may maintain a more sedentary lifestyle to conserve energy until food subsidies  
30 become available (Lowe et al. 2015). Urchins may resorb energy reserves stored in gonad tissues  
31 (Carey et al. 2016) and other tissues may lose mass because rates of cell loss exceed rates of  
32 proliferation (Secor and Carey 2011); such reductions in biomass can reduce energetic  
33 maintenance costs. Finally, starving animals can also reduce metabolic costs by downregulating  
34 cellular-level demand for and supply of ATP (Staples and Buck 2009, Storey 2015). Whether  
35 urchins can transition to hypometabolic states in low-productivity barrens and how this effect  
36 might scale with body size and/or biomass remains, to our knowledge, untested.

37       We hypothesized that emaciated *M. franciscanus* individuals in barrens dramatically  
38 depress their metabolism to maximize energetic efficiency for survival. To quantify the  
39 metabolic state of *M. franciscanus* without the confounding influences of locomotive activity  
40 and postprandial effects, we targeted the resting metabolic rate (RMR). Specifically, we  
41 hypothesized that the body size-specific RMR (i.e. RMR for a given body mass or body volume)  
42 for *M. franciscanus* in food-depauperate barrens would be lower relative to kelp forest habitats.  
43 To test for an effect of habitat on RMR, we compared individuals spanning small (minimum: 25  
44 mm test diameter) through large (maximum: 138 mm test diameter) body sizes living in kelp  
45 forests and barrens in BC, Canada (Fig. 1) in May 2019 on Quadra Island and July 2019 in Haida

46 Gwaii. Study sites included rocky subtidal kelp forests (approx. 2 m below mean low water) and  
47 barrens (approx. 12 m below mean low water) at three locations, Faraday (52.61°N, 131.49°W)  
48 and Murchison (52.60°N, 131.45°W) in Gwaii Haanas on Haida Gwaii, and Surge Narrows  
49 (50.22°N, 125.16 °W) between Quadra and Maurelle Islands. Based on field observations, we  
50 expected size-specific reductions in gonadal mass associated with food limitation in barrens (Fig.  
51 1) giving rise to different allometric exponents for the relationship between body size and  
52 gonadal mass in kelp forests relative to barrens (Ebert et al. 2011).

53 We measured respiration rates of *M. franciscanus* in a cumulative 70 individuals from  
54 kelp forest habitats and 79 individuals from barrens across our three sites as a proxy for  
55 metabolic rate using custom-built sealed chambers (Appendix Fig. S1) fitted with flow-through  
56 optical oxygen sensors and a temperature sensor (Presens Precision Sensing GmbH). To quantify  
57 RMR, we measured respiration rates after a 48-hour period of starvation post-collection from the  
58 wild following (Lighton 2018). We conducted quality control on oxygen time series data using  
59 the R package respR (Harianto et al. 2019). To contextualize metabolic rates, we measured body  
60 size (i.e. internal urchin test volume), total biomass, and gonadal mass. We calculated internal  
61 urchin test volume ( $V$ ) from test height ( $H$ ) and test diameter ( $D$ ) assuming oblate spheroid  
62 geometry ( $V = 4/3\pi D^2H$ ) and recorded two metrics of whole urchin biomass: first wet mass then  
63 ash-free dry mass (AFDM). To measure AFDM, we first dried samples for 24 hours at 60°C in a  
64 drying oven (Thermo Scientific) then combusted dry samples for six hours at 450°C in a muffle  
65 furnace (Thermo Scientific). AFDM targets non-skeletal soft tissue quantified as the difference  
66 between dry mass and post-combustion ash mass. We measured whole-animal wet mass after  
67 cracking and discarding seawater from inside the test, and gonadal wet mass following 30  
68 seconds of drying dissected gonads on a paper towel to correct for variation in water content.

69 Only urchins from Surge Narrows had AFDM measured because of equipment availability. We  
70 estimated additive and interactive effects of habitat and site and body size/mass on RMR and  
71 gonadal wet mass by fitting the metabolic scaling function (i.e.  $RMR = \alpha B^\beta = \exp [\log(\alpha) +$   
72  $\beta \log(B)]$ ) using generalized linear mixed effects models fitted using the R package glmmTMB  
73 (Brooks et al. 2017) with a lognormal likelihood, treating habitat, log-scale metrics of body  
74 size/mass and site as fixed effects, and date and respiration chamber as random effects (Fig. 2).

75 *M. franciscanus* in barrens exhibited dramatically depressed metabolic rates compared to  
76 animals in kelp forests, even after accounting for wet body mass, body volume, or AFDM (Fig.  
77 2). For a given whole-animal wet mass, RMR was nearly 50% lower in barrens urchins  
78 (multiplicative effect on the natural scale was 0.51, 95% CI: 0.43-0.61, compared to kelp forests,  
79  $\chi^2_{df=1} = 59.06$ ,  $P < 0.001$ ). When scaled to wet mass, RMR varied by site ( $\chi^2_{df=2} = 14.38$ ,  $P =$   
80 0.001), but we found no significant interactions between habitat, wet mass, or site (Appendix S1:  
81 Table S6). For a given test volume, RMR was 56% lower in barrens urchins (multiplicative  
82 effect on the natural scale was 0.44, 95% CI: 0.38-0.52, compared to kelp forests,  $\chi^2_{df=1} =$   
83 104.48,  $P < 0.001$ ). When scaled to body volume, RMR varied by site ( $\chi^2_{df=2} = 18.63$ ,  $P < 0.001$ ),  
84 but we found no significant interactions among site, habitat, or body volume (Appendix S1:  
85 Table S8). Urchins at all three sites had significantly lower gonadal wet mass in barrens relative  
86 to kelp forest habitats as indicated by the test-volume x habitat interaction ( $\chi^2_{df=1} = 26.48$ ,  $P <$   
87 0.001) with, on average 44.6% percent lower gonad mass in barrens. At Surge Narrows (where  
88 lab facilities allowed us to take metrics of AFDM) RMR was 43% lower in barrens versus kelp  
89 forest habitats when scaled to metabolically active body mass (multiplicative effect on the  
90 natural scale was 0.57, 95% CI: 0.38-0.86, compared to kelp forests,  $\chi^2_{df=1} = 7.35$ ,  $P = 0.01$ ). For  
91 a given gonadal AFDM, RMR was 34.0% lower in barrens urchins (multiplicative effect on the

92 natural scale was 0.66, 95% CI: 0.53-0.82, compared to kelp forests,  $\chi^2_{df=1} = 14.18$ ,  $P < 0.001$ ).  
93 There was no significant interaction between total AFDM and habitat (RMR versus log total  
94 AFDM x habitat:  $\chi^2_{df=1} = 0.01$ ,  $P = 0.92$ ) but there was a significant interaction between gonadal  
95 AFDM and habitat (RMR versus log gonadal AFDM x habitat:  $\chi^2_{df=1} = 7.08$ ,  $P = 0.01$ ).

96       These observations demonstrate that *M. franciscanus* in barrens not only have reduced  
97 gonadal reserves and thus lower metabolically active body mass, but also exhibit substantial  
98 reductions in mass-specific RMR. Whole-animal RMR was higher for larger individuals in both  
99 habitats at Faraday Island relative to the other two sites, but barren urchins were still  
100 metabolically depressed relative to adjacent kelp forest urchins. This site-specific difference was  
101 likely due to greater food availability, potentially as a result of increased algal subsidy from  
102 exogenous sources at Faraday relative to the other two sites. Large urchins in both habitats at  
103 Faraday had higher gonadal mass, indicating higher food availability (Rogers-Bennett and  
104 Okamoto 2020) than large urchins in the other two sites despite barrens having no endogenous,  
105 macroscopic algae beyond encrusting corallines (Spindel, Okamoto, Lee, unpublished data).  
106 Reductions in metabolic rate substantially exceeded that expected by changes in body mass  
107 alone. One plausible explanation for reductions in mass-specific RMR in *M. franciscanus* is a  
108 reduction in cellular metabolism. Based on evidence from mammalian and avian species, one  
109 might expect the nature of this hypometabolism would depend on the frequency and/or duration  
110 of food deprivation in an organism's past (McCue et al. 2017). For example, starvation may  
111 “reprogram” fetal humans in utero via epigenetic effects so they develop metabolic syndrome in  
112 adulthood (Rinaudo and Wang 2012). Another plausible explanation is that the proportion of  
113 tissues with lower metabolic rate increases by utilizing reversible biomass. Evidence from  
114 mammalian (Rolfe and Brown 1997) and avian (Daan et al. 1990) species shows that metabolic

115 rates differ among tissue types. For example, liver and gastrointestinal tissue contribute  
116 equivalent body mass percentages in both humans and rats, but metabolic contributions of these  
117 tissues differ widely (17% versus 10% in humans, and 20% versus 5% in rats, respectively)  
118 (Rolfe and Brown 1997). Therefore, changes in body composition alone can theoretically  
119 produce changes in whole-animal metabolic rates. As they deplete lipid-rich reserves that may  
120 have lower maintenance costs than other tissues, animals must either reduce their locomotive  
121 activity and/or depress cellular metabolism to endure the energetic burden of food deprivation.  
122 The predominant source of change in body composition we observed in metabolically depressed  
123 urchins was a reduction in gonad mass. One would expect gonadal tissue would be less  
124 metabolically active relative to other tissue types, although we did not measure tissue-specific  
125 respiration rates. A reduction in less-metabolically active tissues would be unlikely to explain  
126 whole animal biomass-specific reductions in RMR. Therefore, we submit that a greater  
127 proportion of the observed metabolic depression is likely due to regulation at a cellular level  
128 rather than shifts in tissue composition, but further studies are required to assess this hypothesis.

129         This phenomenon of mass-specific metabolic depression may help individuals balance  
130 growth and survival amid collapses in or intermittent availability of food. Despite these changes,  
131 urchins can capitalize on any newly available food in short order. Laboratory studies showed that  
132 starved purple urchins (Okamoto 2014), and red urchins (Spindel & Okamoto, unpublished data)  
133 can recover their reduced gonad mass two to three months after re-feeding and revert in a similar  
134 time frame. Unlike many species that cope with food deprivation by entering a dormancy phase  
135 including metabolic depression and suspended development (Hand and Hardewig 1996, Hand et  
136 al. 2016), *M. franciscanus* continues to grow (albeit more slowly), move, and opportunistically  
137 feed while metabolically depressed (Okamoto, Spindel, Lee, unpublished tag-recapture data).

138 Controlled experiments are required to characterize how and why this may occur, over what time  
139 scales, and to evaluate impacts of metabolic depression on rates of herbivory and the persistence  
140 of barrens. However, these observations from three sites in BC support the notion that *M.*  
141 *franciscanus* in barrens can dramatically reduce their energetic demands. Moreover, these shifts  
142 in metabolic rate may provide a mechanism that facilitates barren state stability over long time  
143 scales as *M. franciscanus* can lower energetic demands while they wait for small pulses of food,  
144 scrape by on low-productivity resources, and suppress recruitment of macroalgae for months,  
145 years, or decades.

146

147

#### ACKNOWLEDGEMENTS

148 We thank Leandre Vigneault of Marine Toad Enterprises Inc. and Dan McNeill, Ben  
149 Penna, Jaasaljuus Yakgujanaas, Vanessa Bellis and Dion Lewis of the Council of the Haida  
150 Nation Haida Fisheries Program for assistance with specimen collection in Gwaii Haanas;  
151 Markus Thompson of Thalassia Environmental, Ryan Miller of Miller Marine Diving Services,  
152 and Ondine Pontier of the Hakai Institute for assistance with specimen collection and underwater  
153 photography at Quadra Island; Eric Peterson and the Hakai Institute for providing laboratory  
154 facilities at Quadra Island and for technical support; and Gwaii Haanas National Park Reserve,  
155 National Marine Conservation Area Reserve, and Haida Heritage Site for technical support,  
156 remote infrastructure and field personnel including Charlotte Houston, Niisii Guujaaw, Clint  
157 Johnson Kendrick, Chavonne Guthrie and Marilyn Deschenes. This study was funded by an FSU  
158 APACT grant to DKO, Parks Canada Conservation and Restoration (CoRe) project funding to  
159 the Gwaii Haanas Field Unit with LL as technical lead and DKO via contribution agreement with  
160 FSU, the William R. and Lenore Mote Eminent Scholar in Marine Biology Endowment at FSU



161 to NBS, a Professional Association of Diving Instructors (PADI) Foundation Research Grant to  
162 NBS, an Academy of Underwater Arts and Sciences Zale Parry Scholarship to NBS, and the  
163 Tula Foundation.

164

165

166

167

#### LITERATURE CITED

- 168 Britton-Simmons, K. H., G. Foley, and D. J. A. B. Okamoto. 2009. Spatial subsidy in the subtidal  
169 zone: utilization of drift algae by a deep subtidal sea urchin. **5**:233-243.
- 170 Brooks, M. E., K. Kristensen, K. J. van Benthem, A. Magnusson, C. W. Berg, A. Nielsen, H. J.  
171 Skaug, M. Machler, and B. M. Bolker. 2017. glmmTMB Balances Speed and Flexibility  
172 Among Packages for Zero-inflated Generalized Linear Mixed Modeling. *R Journal* **9**:378-  
173 400.
- 174 Carey, N., J. Harianto, and M. Byrne. 2016. Sea urchins in a high-CO<sub>2</sub> world: partitioned effects  
175 of body size, ocean warming and acidification on metabolic rate. *J Exp Biol* **219**:1178-  
176 1186.
- 177 Daan, S., D. Masman, and A. Groenewold. 1990. Avian Basal Metabolic Rates - Their  
178 Association with Body-Composition and Energy-Expenditure in Nature. *American*  
179 *Journal of Physiology* **259**:R333-R340.
- 180 Dawson, G. M. 1880. Report on the Queen Charlotte Islands, 1878. Dawson Brothers.
- 181 Duggins, D. O. 1981. Sea urchins and kelp: The effects of short term changes in urchin diet1.  
182 *Limnology and Oceanography* **26**:391-394.
- 183 Ebert, T., J. Hernandez, and M. Russell. 2011. Problems of the gonad index and what can be  
184 done: analysis of the purple sea urchin *Strongylocentrotus purpuratus*. *Marine Biology*  
185 **158**:47-58.
- 186 Ebert, T. A. J. E. g. 2008. Longevity and lack of senescence in the red sea urchin  
187 *Strongylocentrotus franciscanus*. *Exp Gerontol* **43**:734-738.
- 188 Filbee-Dexter, K., and R. E. Scheibling. 2014. Sea urchin barrens as alternative stable states of  
189 collapsed kelp ecosystems. *Marine Ecology Progress Series* **495**:1-25.
- 190 Hand, S. C., D. L. Denlinger, J. E. Podrabsky, and R. Roy. 2016. Mechanisms of animal  
191 diapause: recent developments from nematodes, crustaceans, insects, and fish. *Am J*  
192 *Physiol Regul Integr Comp Physiol* **310**:R1193-1211.
- 193 Hand, S. C., and I. Hardewig. 1996. Downregulation of cellular metabolism during  
194 environmental stress: mechanisms and implications. *Annual review of physiology*  
195 **58**:539-563.
- 196 Harianto, J., N. Carey, and M. Byrne. 2019. respR—An R package for the manipulation and  
197 analysis of respirometry data. *Methods in Ecology and Evolution* **0**.
- 198 Lighton, J. R. 2018. Measuring metabolic rates: a manual for scientists. Oxford University Press.
- 199 Ling, S., and C. J. M. E. P. S. Johnson. 2009. Population dynamics of an ecologically important  
200 range-extender: kelp beds versus sea urchin barrens. **374**:113-125.

- 201 Lowe, A. T., R. Whippo, A. W. E. Galloway, K. H. Britton-Simmons, and M. N. Dethier. 2015.  
202 Sedentary urchins influence benthic community composition below the macroalgal zone.  
203 *Marine Ecology-an Evolutionary Perspective* **36**:129-140.
- 204 McCue, M. D. 2010. Starvation physiology: Reviewing the different strategies animals use to  
205 survive a common challenge. *Comparative Biochemistry and Physiology Part A:*  
206 *Molecular & Integrative Physiology* **156**:1-18.
- 207 McCue, M. D., J. S. Terblanche, and J. B. Benoit. 2017. Learning to starve: impacts of food  
208 limitation beyond the stress period. *The Journal of Experimental Biology* **220**:4330-4338.
- 209 Okamoto, D. K. 2014. The role of fluctuating food supply on recruitment, survival and population  
210 dynamics in the sea. UC Santa Barbara.
- 211 Quintanilla-Ahumada, D., P. A. Quijón, J. M. Navarro, J. Pulgar, and C. Duarte. 2018. Living on  
212 a trophic subsidy: Algal quality drives an upper-shore herbivore's consumption,  
213 preference and absorption but not growth rates. *PLoS One* **13**:e0196121.
- 214 Rasher, D. B., R. S. Steneck, J. Halfar, K. J. Kroeker, J. B. Ries, M. T. Tinker, P. T. W. Chan, J.  
215 Fietzke, N. A. Kamenos, B. H. Konar, J. S. Lefcheck, C. J. D. Norley, B. P. Weitzman, I.  
216 T. Westfield, and J. A. Estes. 2020. Keystone predators govern the pathway and pace of  
217 climate impacts in a subarctic marine ecosystem. *science* **369**:1351-1354.
- 218 Renaud, P. E., T. S. Lokken, L. L. Jorgensen, J. Berge, and B. J. Johnson. 2015. Macroalgal  
219 detritus and food-web subsidies along an Arctic fjord depth-gradient. *Frontiers in Marine*  
220 *Science* **2**:31.
- 221 Rinaudo, P., and E. J. A. r. o. p. Wang. 2012. Fetal programming and metabolic syndrome.  
222 *Annu Rev Physiol* **74**:107-130.
- 223 Rodríguez, S. R. 2003. Consumption of drift kelp by intertidal populations of the sea urchin  
224 *Tetrapygus niger* on the central Chilean coast: possible consequences at different  
225 ecological levels. *Marine Ecology Progress Series* **251**:141-151.
- 226 Rogers-Bennett, L., and D. Okamoto. 2020. *Mesocentrotus franciscanus* and  
227 *Strongylocentrotus purpuratus*. Pages 593-608 in J. M. Lawrence, editor. *Sea Urchins:*  
228 *Biology and Ecology*. Elsevier.
- 229 Rolfe, D. F., and G. C. Brown. 1997. Cellular energy utilization and molecular origin of standard  
230 metabolic rate in mammals. *Physiol Rev* **77**:731-758.
- 231 Scheibling, R. E., C. J. Feehan, and B. G. Hatcher. 2020. Chapter 31 - *Strongylocentrotus*  
232 *droebachiensis*. Pages 553-591 in J. M. Lawrence, editor. *Developments in Aquaculture*  
233 *and Fisheries Science*. Elsevier.
- 234 Secor, S. M., and H. V. Carey. 2011. Integrative physiology of fasting. *Comprehensive*  
235 *Physiology* **6**:773-825.
- 236 Staples, J. F., and L. T. Buck. 2009. Matching cellular metabolic supply and demand in energy-  
237 stressed animals. *Comparative Biochemistry and Physiology Part A: Molecular &*  
238 *Integrative Physiology* **153**:95-105.
- 239 Stearns, S. C. 2000. Life history evolution: successes, limitations, and prospects.  
240 *Naturwissenschaften* **87**:476-486.
- 241 Storey, K. B. 2015. Regulation of hypometabolism: insights into epigenetic controls. *Journal of*  
242 *Experimental Biology* **218**:150-159.
- 243 Vanderklift, M. A., and T. Wernberg. 2008. Detached kelps from distant sources are a food  
244 subsidy for sea urchins. *Oecologia* **157**:327-335.
- 245

246

## FIGURE CAPTIONS

247 Figure 1. Visual comparison of typical qualitative habitat characteristics and internal anatomy of  
248 resident sea urchins in kelp forest versus barrens habitats. A) Dissected urchins with diminutive  
249 gonads typical of barrens. B) Dissected urchins with robust gonads typical of kelp forest urchins.  
250 C) Barrens habitat at Surge Narrows, BC, at a depth of approx. 12 m below chart datum low tide.  
251 D) At the edge of kelp forest habitat at Surge Narrows, BC, Canada, at a depth of approx. 3 m  
252 relative to chart datum low tide. E) Barrens habitat at Murchison Island in Gwaii Haanas at a  
253 depth of approx. 12 m relative to chart datum low tide. F) At the edge of kelp forest habitat at  
254 Murchison Island in Gwaii Haanas National Park Reserve, National Marine Conservation Area  
255 Reserve, and Haida Heritage Site, at a depth of approx. 3 m relative to chart datum low tide.  
256 Photo A was taken by Spindel, B was taken by Lee, C and D were taken by Markus Thompson,  
257 and E and F were taken by Ryan Miller.

258

259 Figure 2. Comparison of resting metabolic rate in *M. franciscanus* versus metrics of body size by  
260 habitat and site. Dots represent 2019 volumetric oxygen consumption rate ( $VO_2$ ) measurements  
261 from individual urchins. Lines and ribbons represent modelled mean  $VO_2$  and SE, respectively.  
262 Panels A and B contrast the scaling relationship in barren versus kelp forest habitat at Surge  
263 Narrows, BC, Canada, between  $VO_2$  and total ash-free dry mass and gonadal ash-free dry mass,  
264 respectively. Panels C-E show geographic comparison of the scaling relationships in barrens  
265 versus kelp forest habitats between  $VO_2$  and body size (i.e. test volume) among sites at Faraday  
266 Island, Murchison Island, and Surge Narrows, BC, Canada.

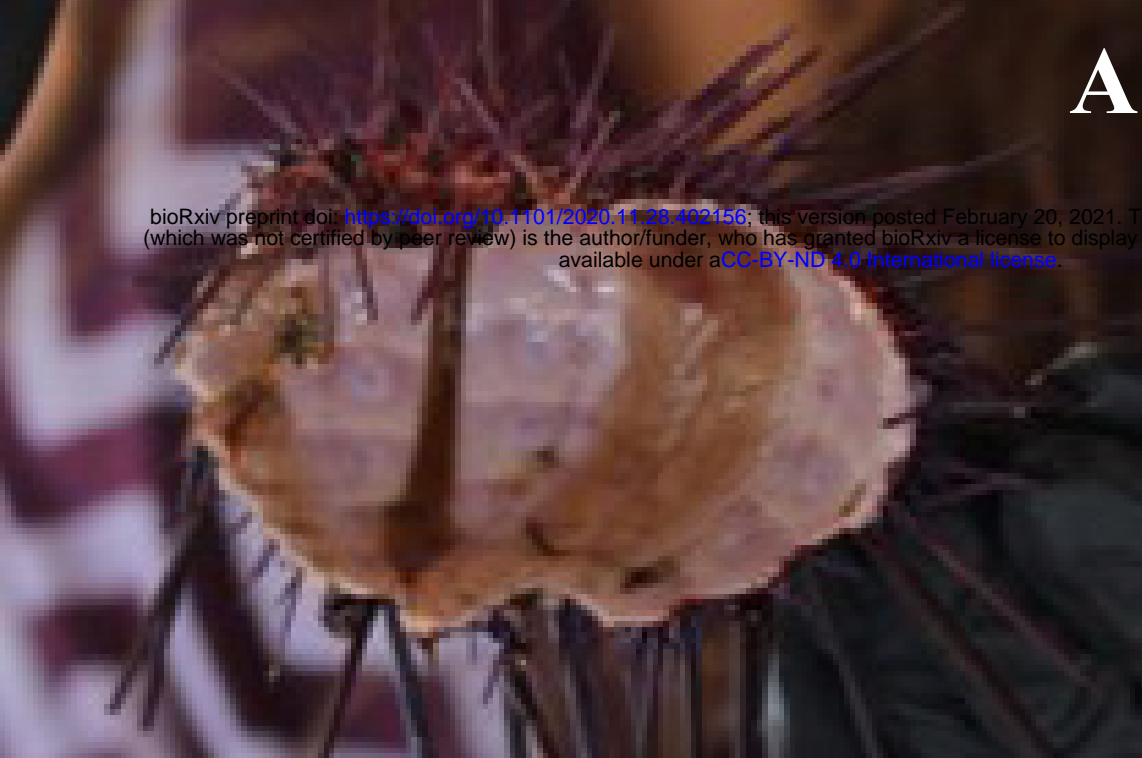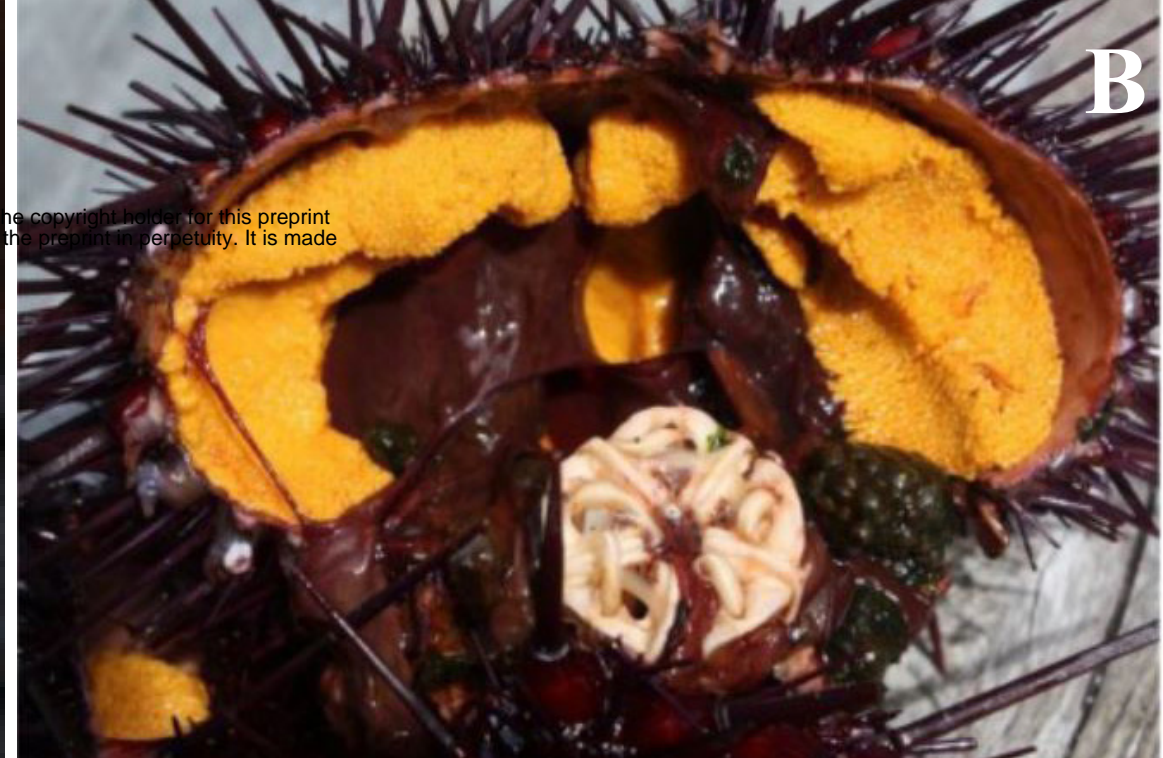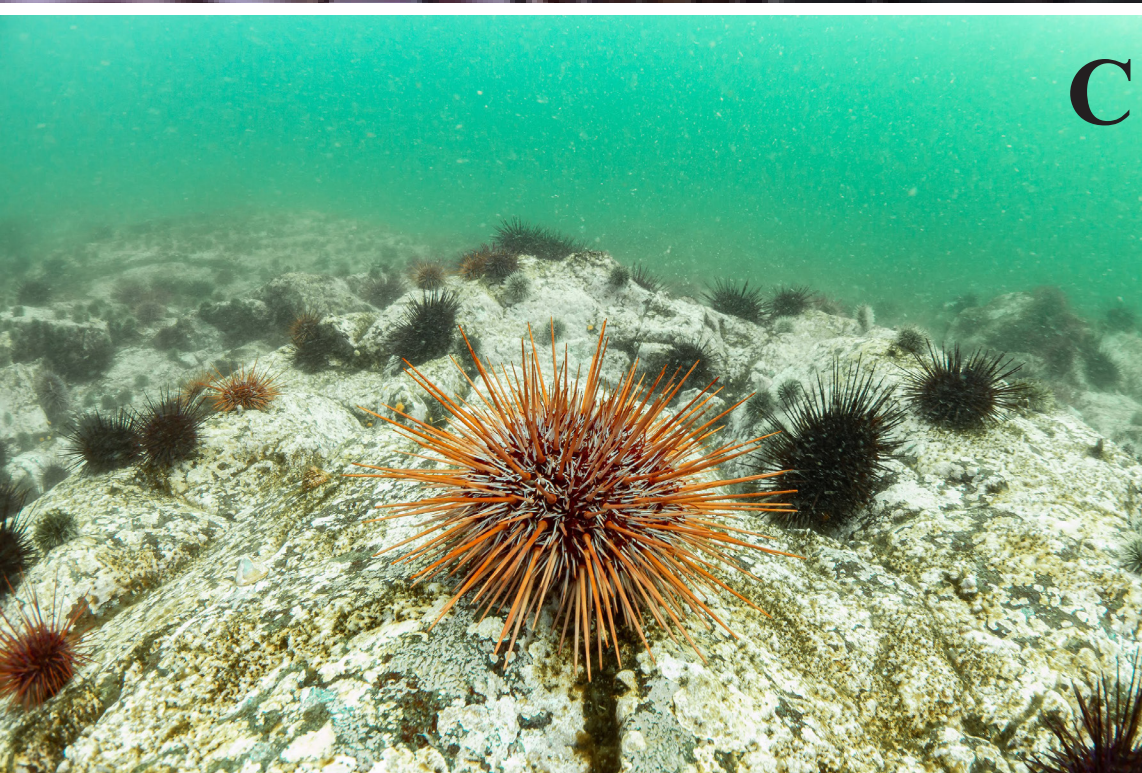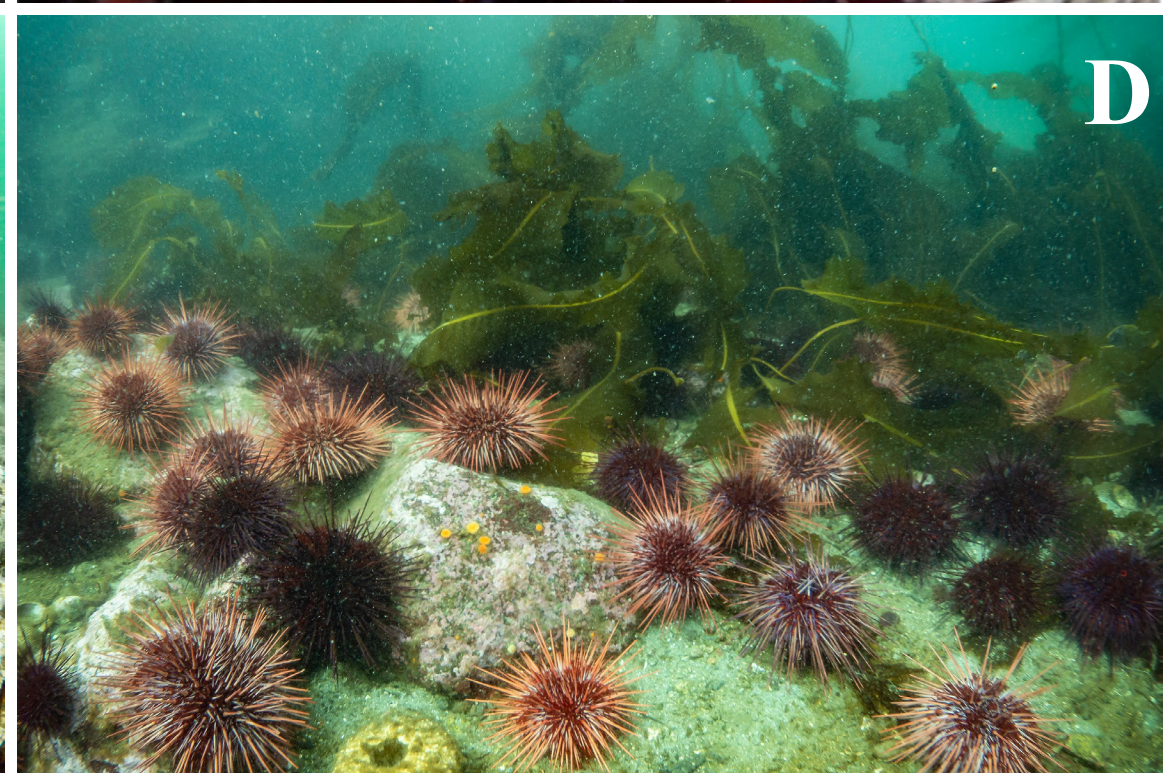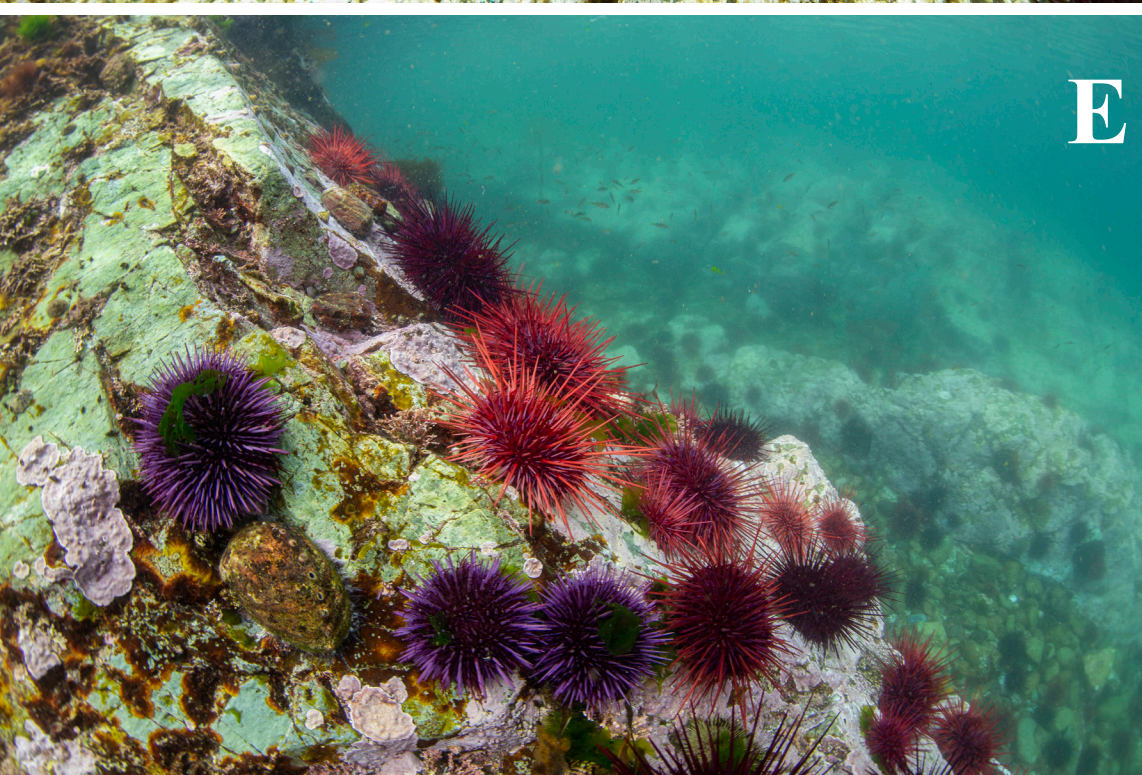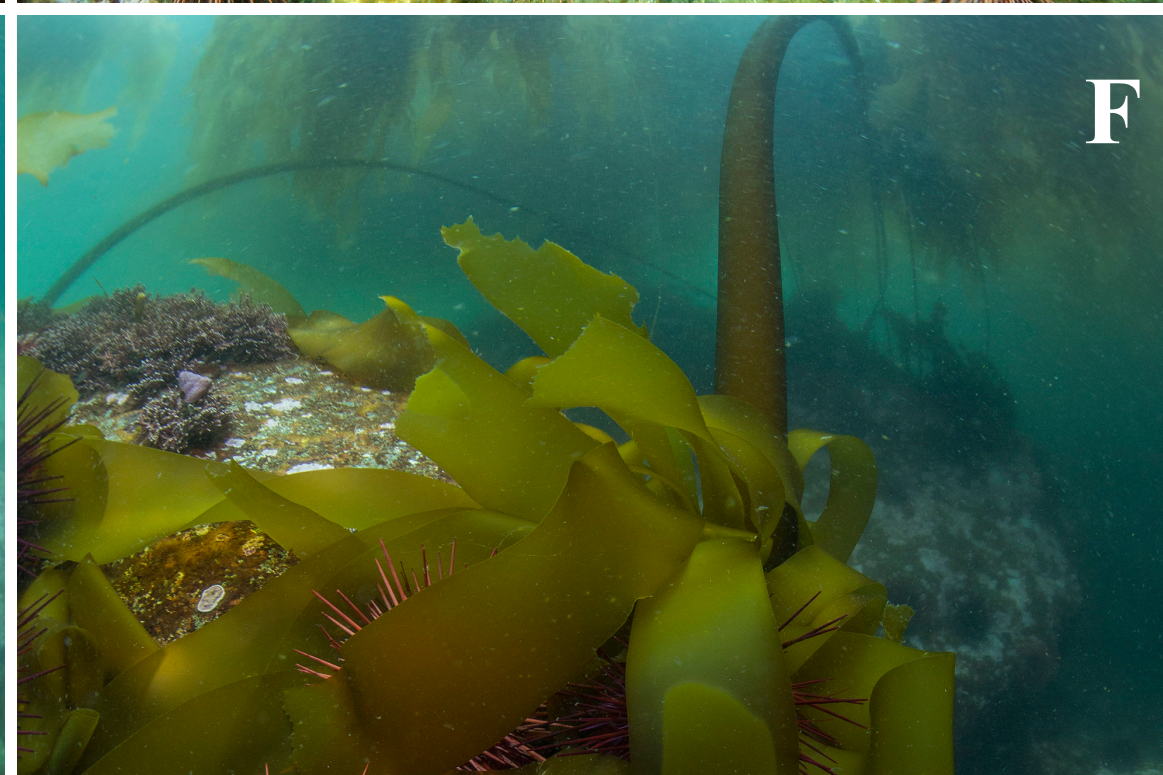

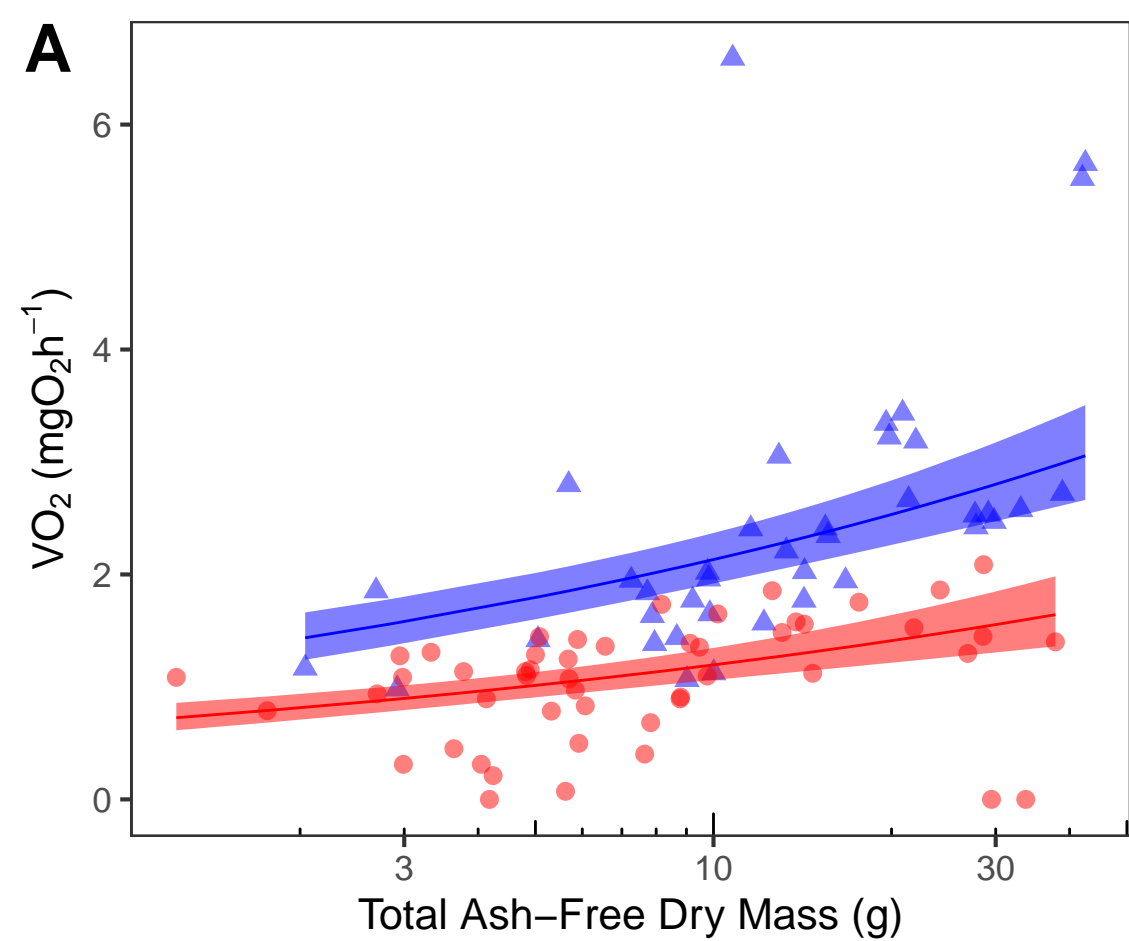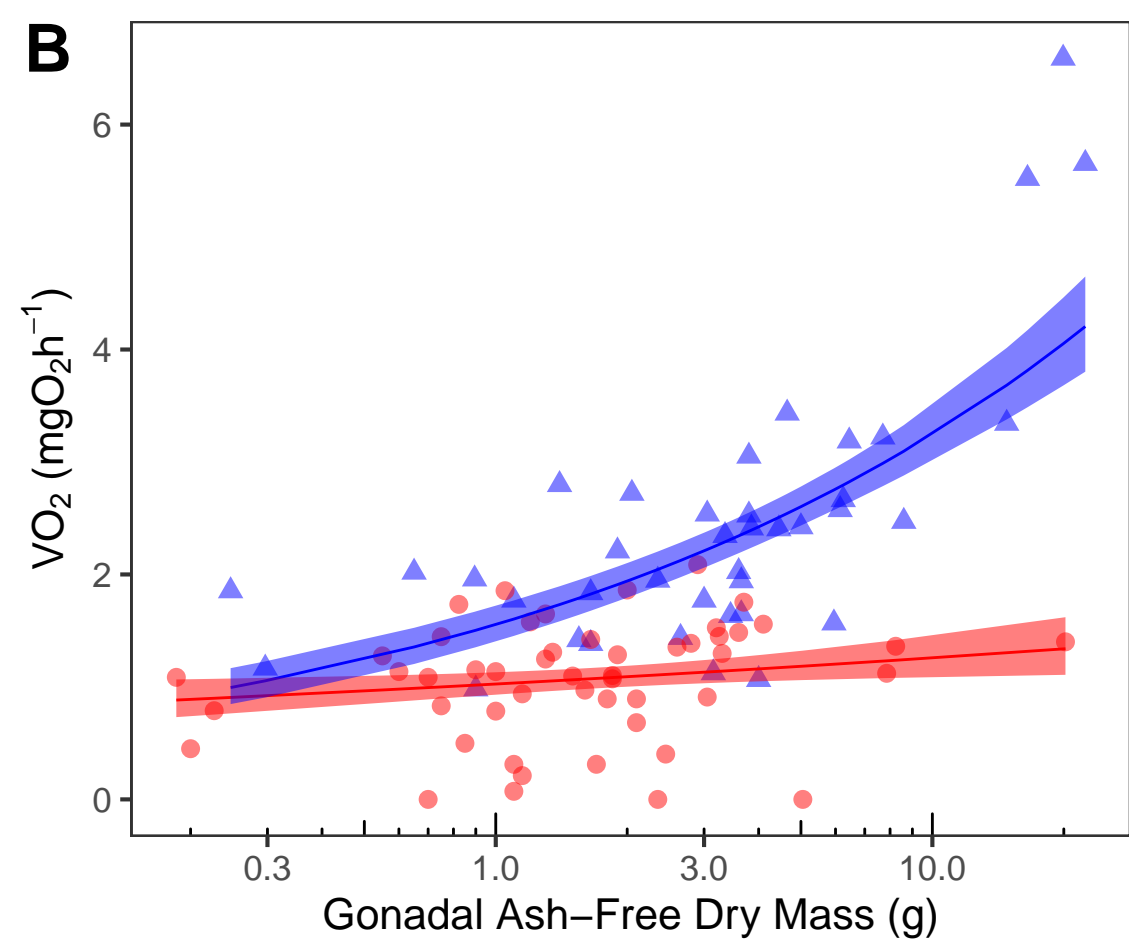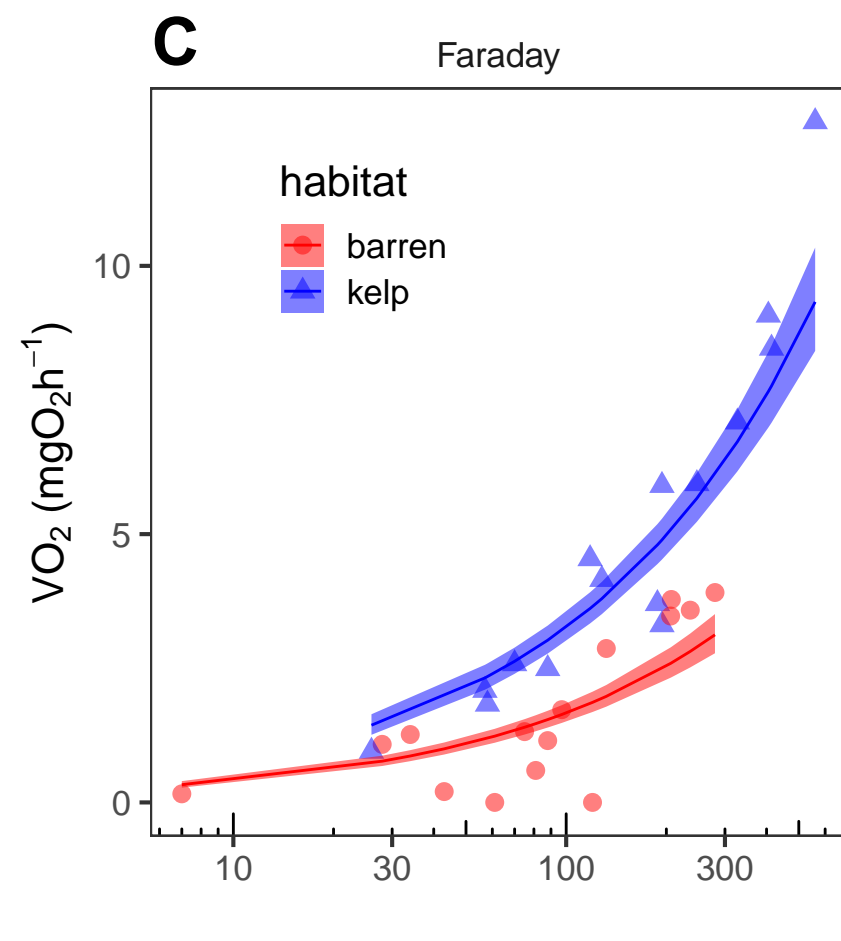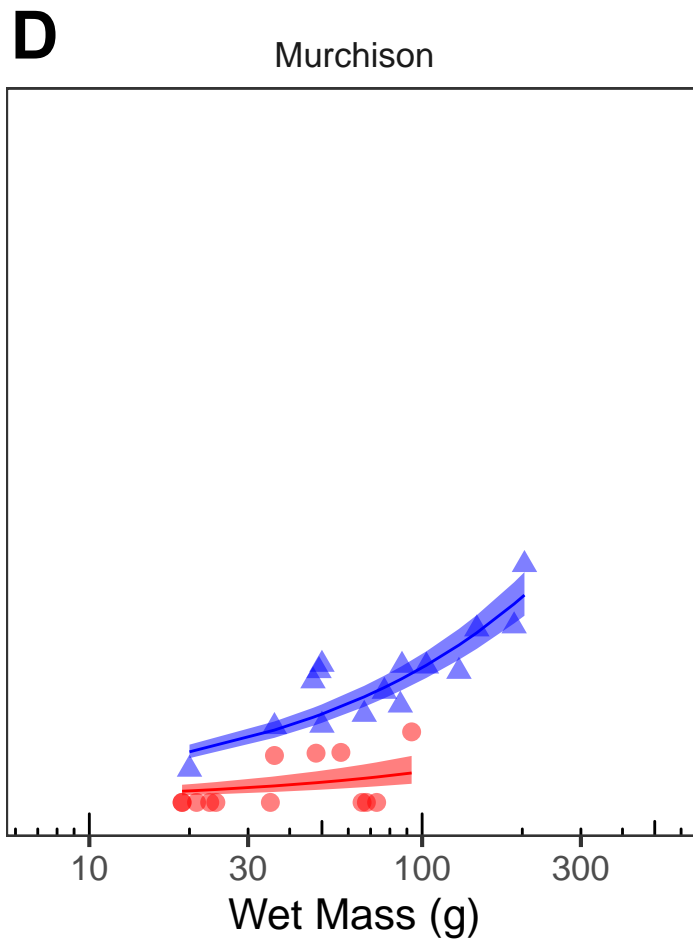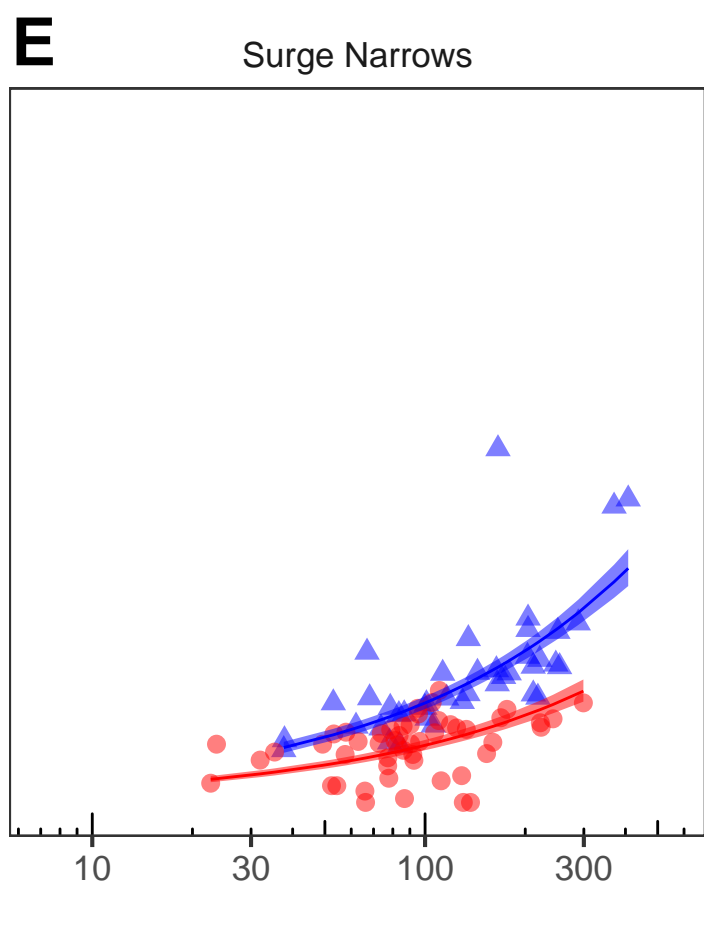

A

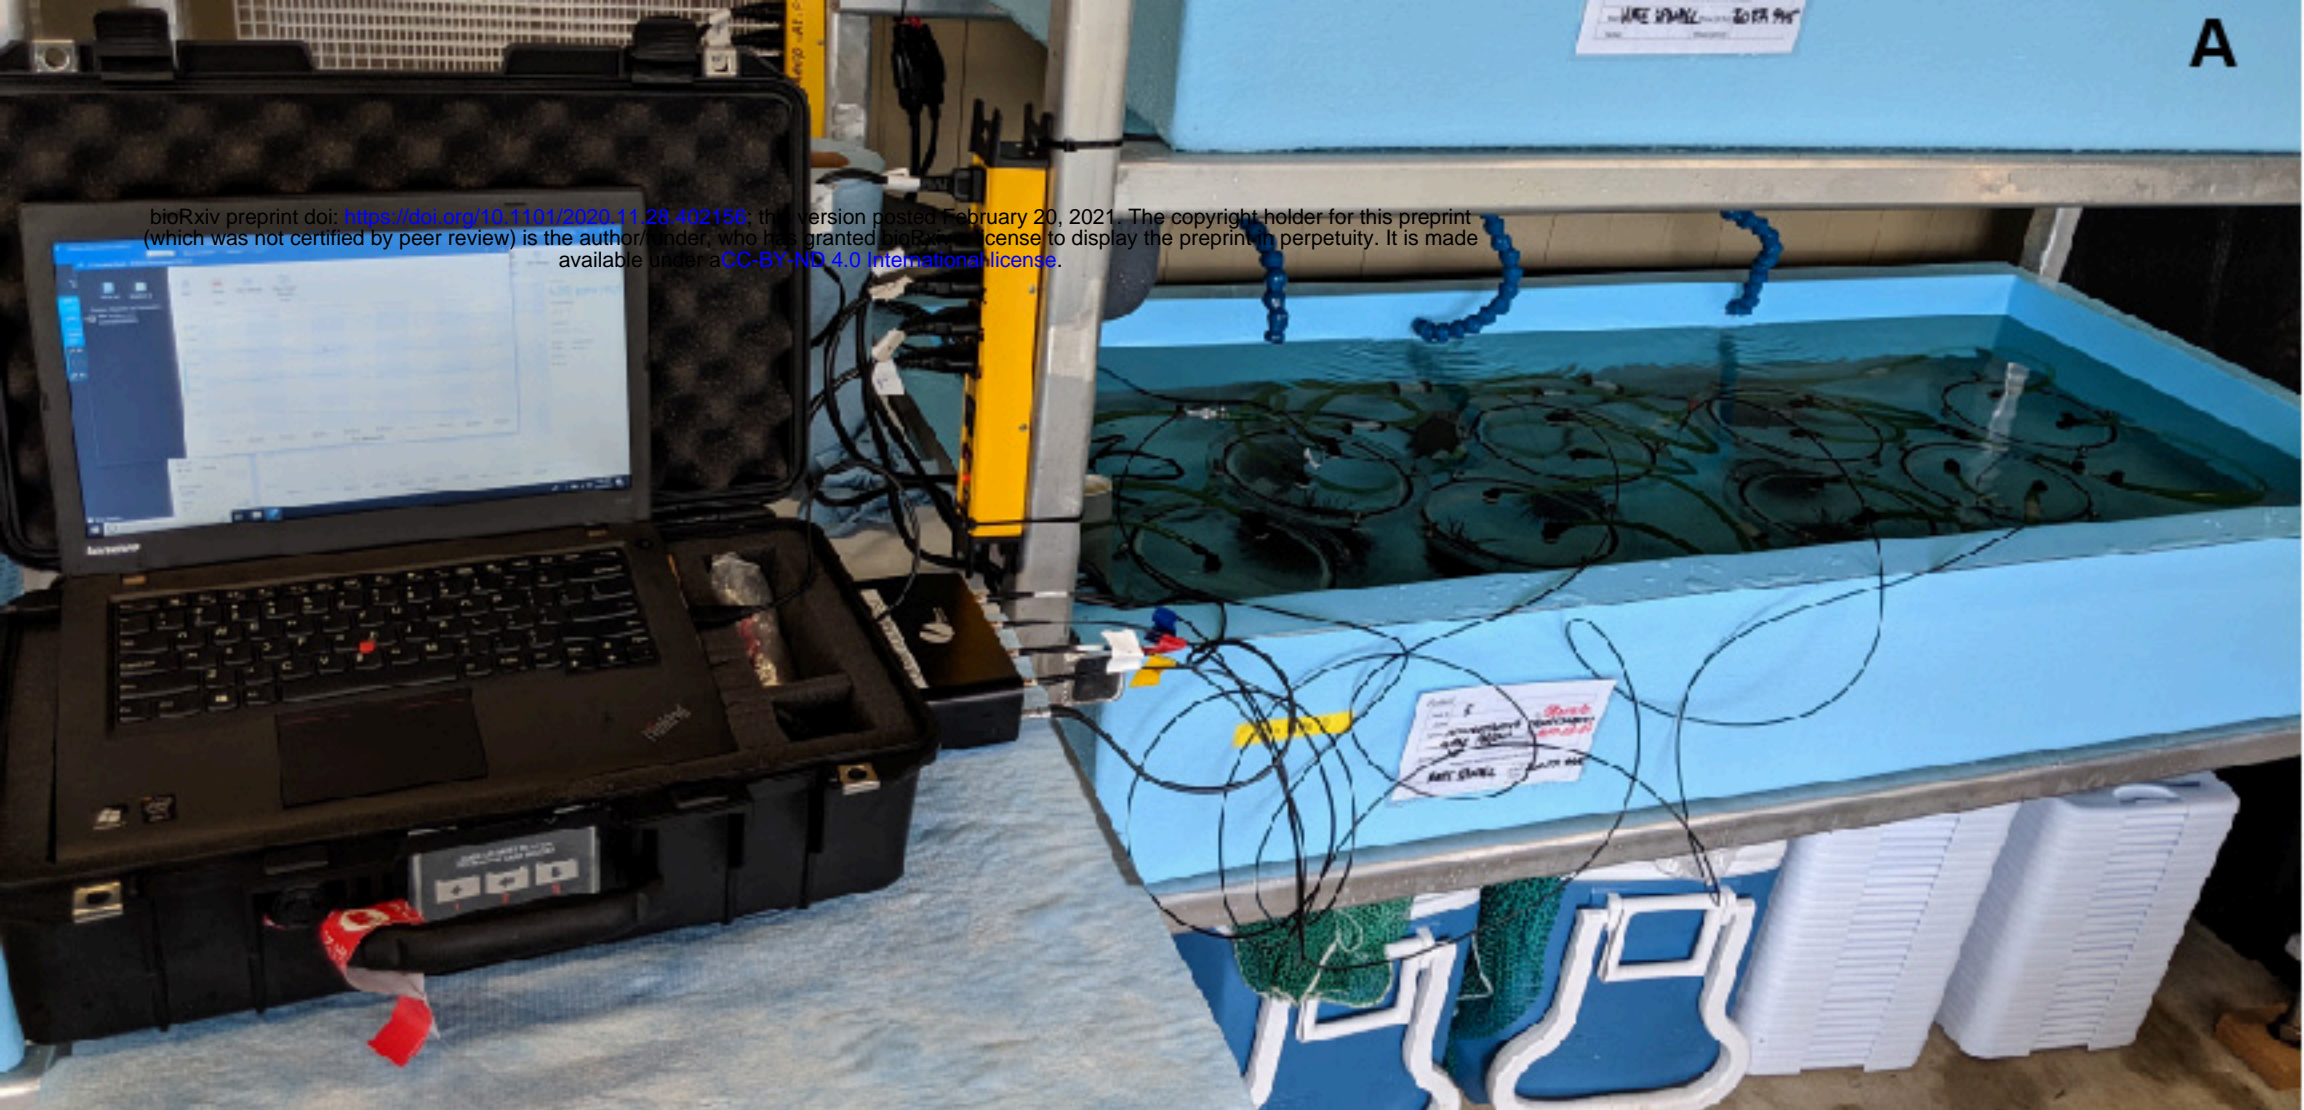

B

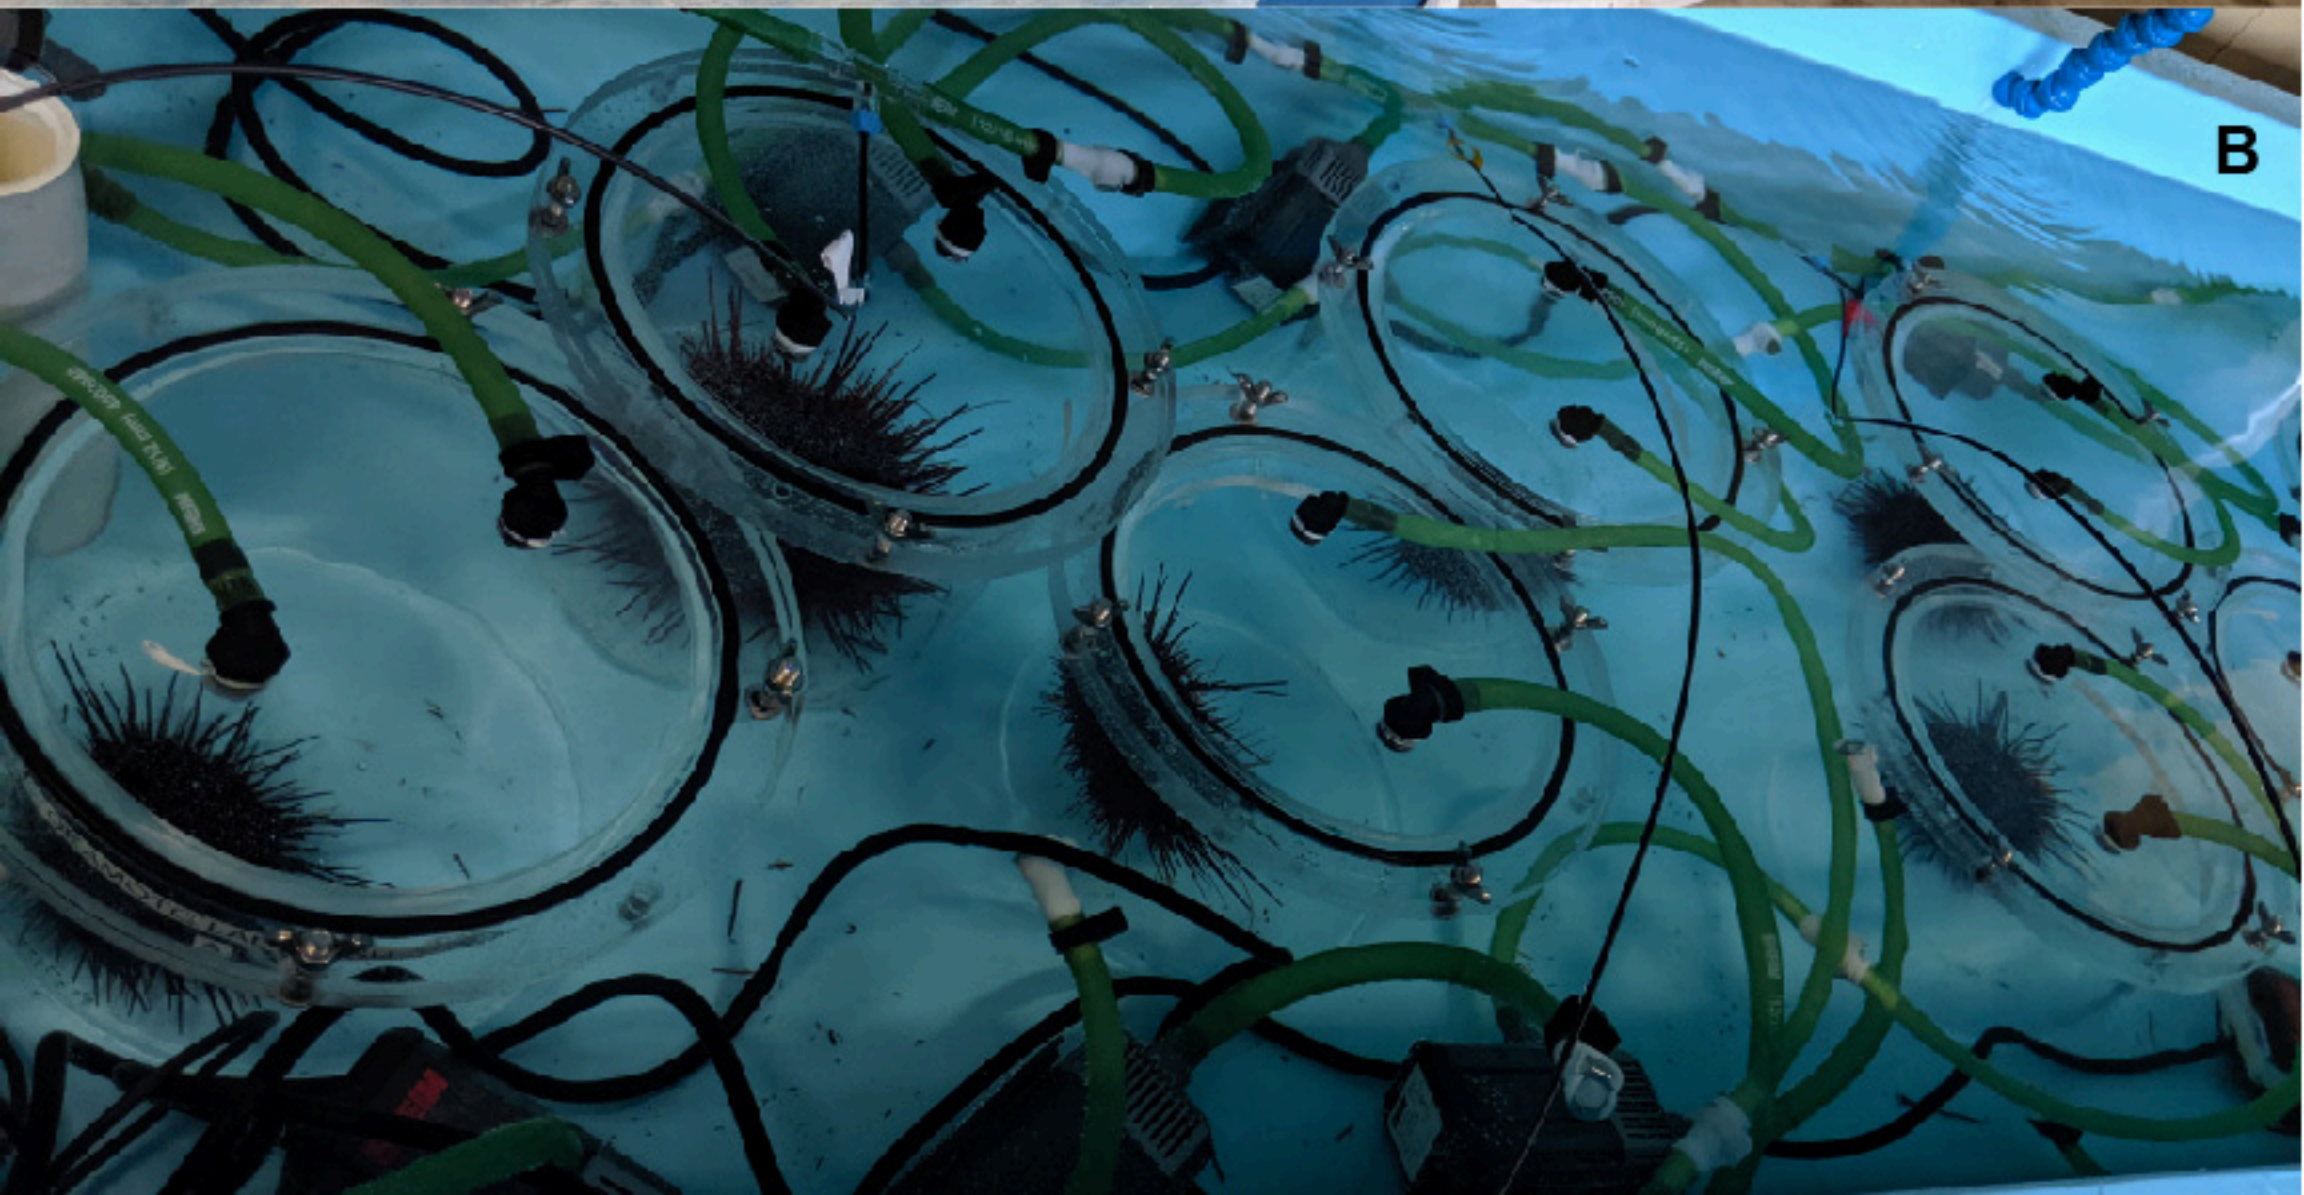

Source: https://www.biorxiv.org/content/10.1101/2020.11.28.402156v3.full.pdf
